# Supplementary material for: SUMO Modification of OsFKBP20-1b Is Integral to Proper Pre-mRNA Splicing upon Heat Stress in Rice
Source: MDPI journal article supplement (doi:10.3390/ijms22169049), 2021-08-22
Supplement: s1 [file s1]

a

|                                                                                                                                                                                                             |      |                  |       |                                |      |                  |       |
|-------------------------------------------------------------------------------------------------------------------------------------------------------------------------------------------------------------|------|------------------|-------|--------------------------------|------|------------------|-------|
| Protein ID: N/A                                                                                                                                                                                             |      |                  |       |                                |      |                  |       |
| Definition: N/A                                                                                                                                                                                             |      |                  |       |                                |      |                  |       |
| Length: 185 aa                                                                                                                                                                                              |      |                  |       |                                |      |                  |       |
| 1 KSETIDLTGD PCILKTVIRR AKDDATAPSD SLPVVDHWE GLAENGVF 51 DTTHENSVF SPEIGBTVI KARDIAKTM KYGEVAKITC KPEVAYGAG 101 SPPEIPPDAT LTPEVGLIAC RFRIGSSVES KYGEKALEE LYQGEVIAA 151 KVEEGRATE EKAAAKRW QAKLEMKIK GKXAK |      |                  |       |                                |      |                  |       |
|                                                                                                                                                                                                             |      |                  |       | ■ Motifs with high probability |      |                  |       |
|                                                                                                                                                                                                             |      |                  |       | ■ Motifs with low probability  |      |                  |       |
|                                                                                                                                                                                                             |      |                  |       | ■ Overlapping Motifs           |      |                  |       |
| No.                                                                                                                                                                                                         | Pos. | Group            | Score | No.                            | Pos. | Group            | Score |
| 1                                                                                                                                                                                                           | K173 | AARVQ AKLE AKKGK | 0.79  | 4                              | K81  | IAVKT MKVG EVAKI | 0.63  |
| 2                                                                                                                                                                                                           | K152 | EIAAA AKEE EKRRK | 0.79  | 5                              | K177 | QAKLE AKKG KGKKA | 0.62  |
| 3                                                                                                                                                                                                           | K22  | TVIRR AKDD ATAPS | 0.79  | 6                              | K158 | KEEKK RKRE EAKAA | 0.44  |

b

| ID      | Position | Peptide           | Score  | Cutoff | P-value | Type                     |
|---------|----------|-------------------|--------|--------|---------|--------------------------|
| Unnamed | 34 - 38  | AFDSGLPVTVEESTLAE | 43.415 | 29.92  | 0.075   | SUMO Interaction         |
| Unnamed | 135      | VEVSVEEAELEELK    | 3.993  | 3.32   | 0.066   | Sumoylation Nonconsensus |
| Unnamed | 152      | REIAAAVFEERKR     | 5.08   | 2.13   | 0.025   | Sumoylation Consensus    |
| Unnamed | 177      | VQAKLEAVTGGHKA    | 4.65   | 3.32   | 0.043   | Sumoylation Nonconsensus |
| Unnamed | 178      | QAKLEAVTGGHKA     | 3.504  | 3.32   | 0.046   | Sumoylation Nonconsensus |
| Unnamed | 183      | AKHGKGLA*****     | 3.77   | 3.32   | 0.046   | Sumoylation Nonconsensus |
| Unnamed | 185      | KGHGLA*****       | 4.321  | 3.32   | 0.046   | Sumoylation Nonconsensus |

**Supplementary Figure S1 . Prediction of SUMOylation sites in OsFKBP20-1b.**  
OsFKBP20-1b protein sequences were analyzed by **(a)** SUMOplot™ analysis program and **(b)** GPS-SUMO online service

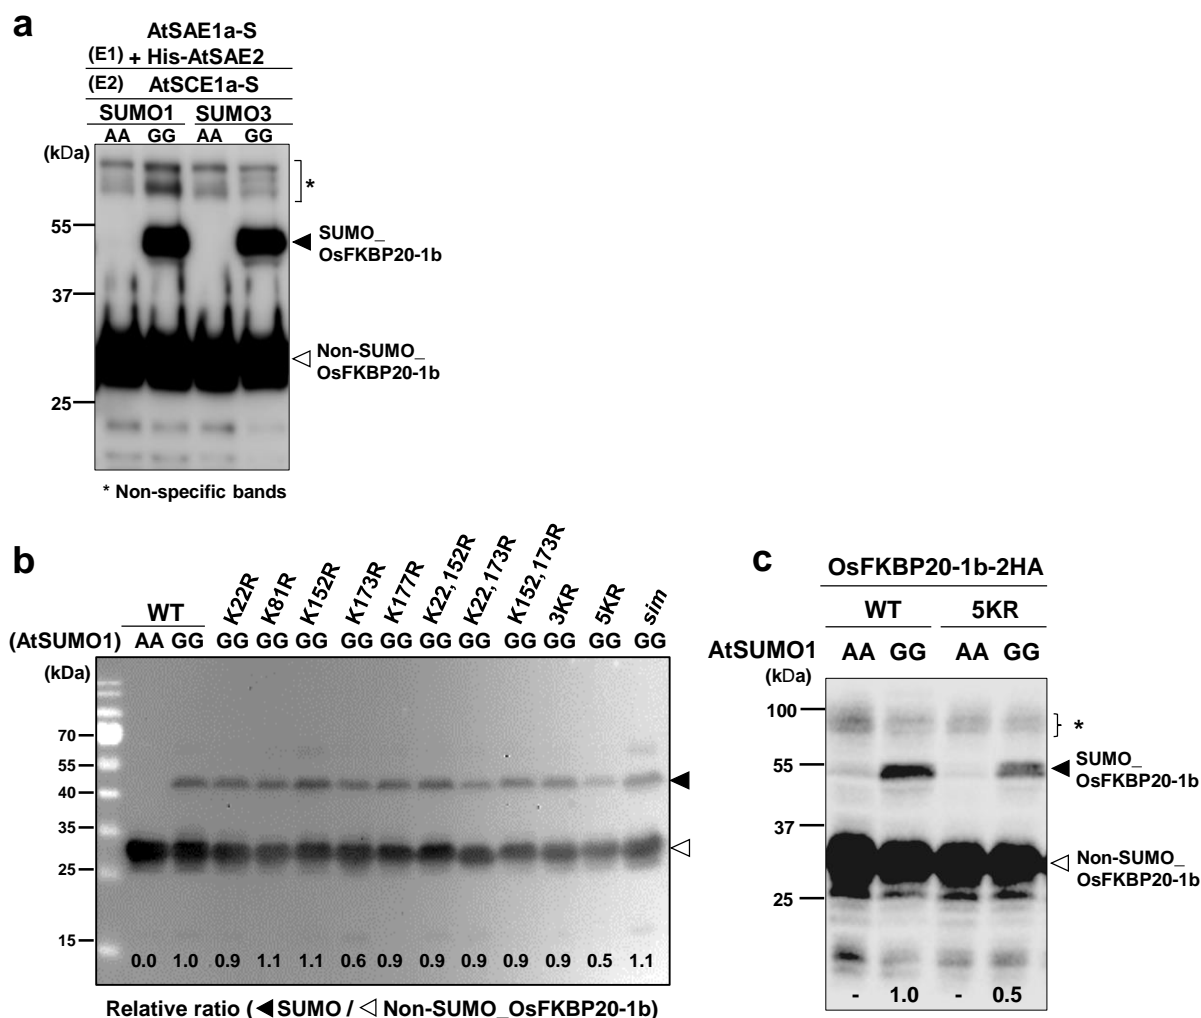

### Supplementary Figure S2. *In vitro* SUMOylation assays of OsFKBP20-1b.

**a.** SUMOylation assay of OsFKBP20-1b through reconstitution of the SUMO conjugation pathway in *E. coli*. HA-fused OsFKBP20-1b was expressed into the *E. coli* systems expressing the SUMOylation enzymes E1 (AtSAE1a, AtSAE2), E2 (SCE1a) and AtSUMO-1 or AtSUMO-3. After IPTG incubation, OsFKBP20-1b was detected by immunoblotting with anti-HA antibody. GG and AA stand for WT forms of SUMO and non-functional SUMO1G92,93A, respectively. **b.** *E. coli* cells containing *in vitro* SUMOylation components were transfected with OsFKBP20-1b WT or various KR mutants (3KR, K22,152,173R; 5KR, K22,81,152,173,177R, *sim*, sumo-interacting motif mutation (IVDV34-37AADA)) as indicated, and immunoblot was performed by anti-HA antibody. The relative intensities of the SUMO-modified and unmodified non-SUMO\_OsFKBP20-1b were determined by a densitometry. **c.** *E. coli* cells containing *in vitro* SUMOylation components were transfected with OsFKBP20-1b WT or 5KR mutants (K22,81,152,173,177R) as indicated, and immunoblot was performed by anti-HA antibody. Asterisk means non-specific band. The relative intensities of the SUMO\_OsFKBP20-1b were determined by a densitometry.

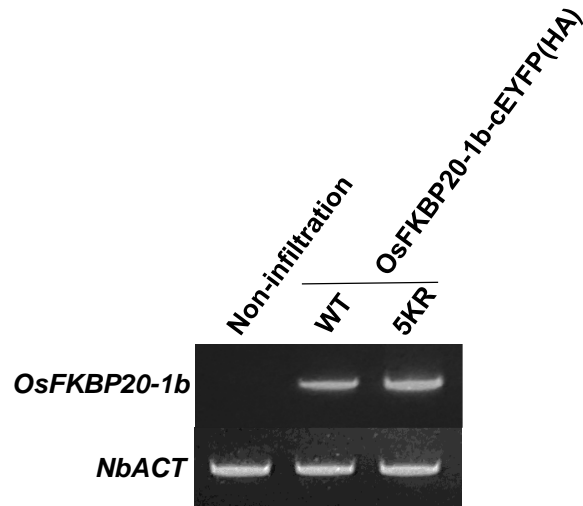

**Supplementary Figure S3. Transcript levels of wild-type OsFKBP20-1b (WT) and less SUMO 5KR mutant OsFKBP20-1b (5KR) in *Nicotiana benthamiana*.**

OsFKBP20-1b WT and 5KR were cloned into cEYFP (HA tag) vector and co-infiltrated with GFP into the leaves of 4-week-old *Nicotiana benthamiana* and 2 days after infiltration total mRNA was extracted from the leaves. Transcription levels of *OsFKBP20-1b* in leaves of *Nicotiana benthamiana* expressing by agro-infiltration mediated transient expression. The expression levels were showed using semi-quantitative RT-PCR analysis. *NbACT* was used for loading control.

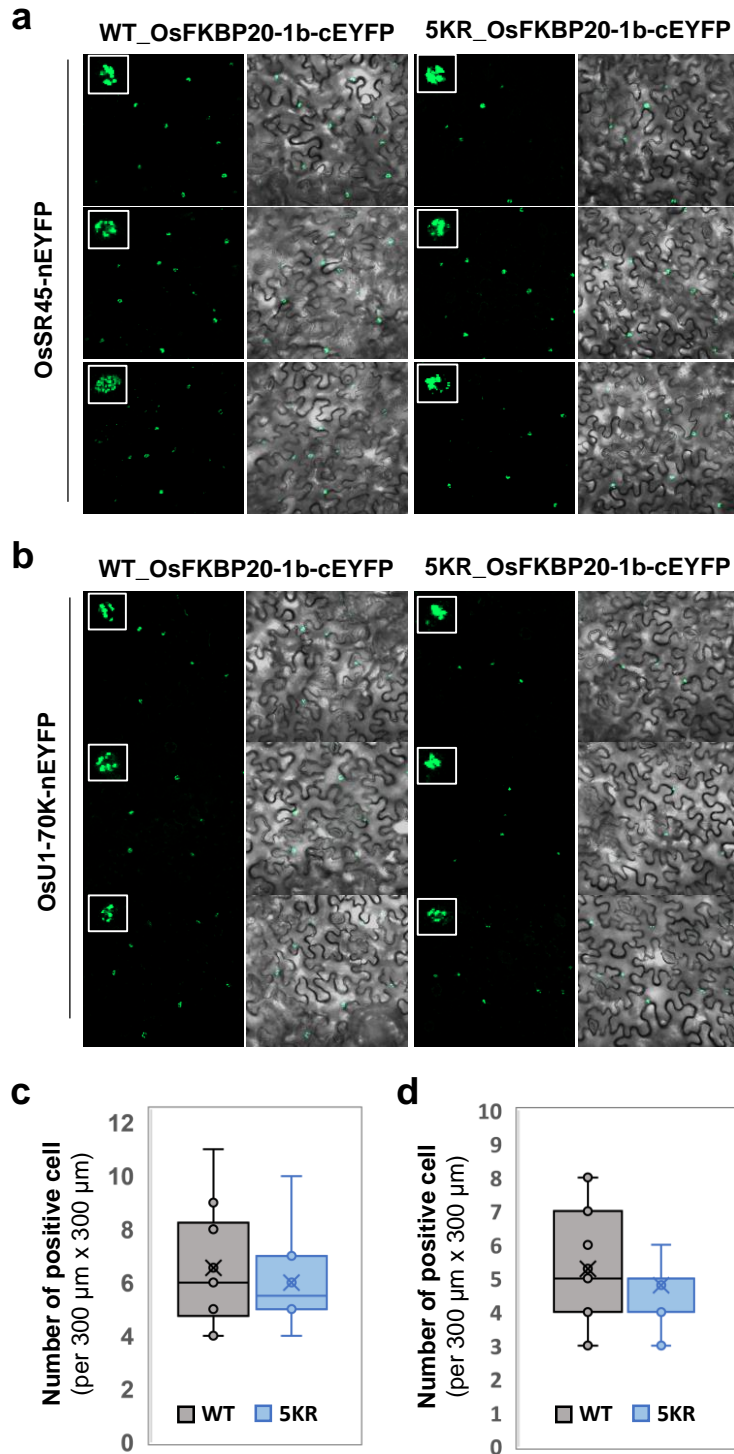

**Supplementary Figure S4. Interaction between OsSR45 or OsU1-70K with OsFKBP20-1b in plant cells.**

OsSR45 or OsU1-70k were fused to nEYFP and WT\_ or 5KR\_OsFKBP20-1b were fused to cEYFP for BiFC assay. Each construct was co-infiltrated into the leaves of *Nicotiana benthamiana* using agrobacterium. Two days after infiltration, the leaves were observed using a confocal microscope. (bar = 50  $\mu\text{m}$ ) **a and c**. Interaction of OsSR45 with WT\_ or 5KR\_OsFKBP20-1b. **b and d**. Interaction of OsU1-70k with WT\_ or 5KR\_OsFKBP20-1b. Number of GFP positive cells (in 300 x 300  $\mu\text{m}^2$ ) of WT\_ or 5KR\_OsFKBP20-1b-GFP were counted (n = 7).

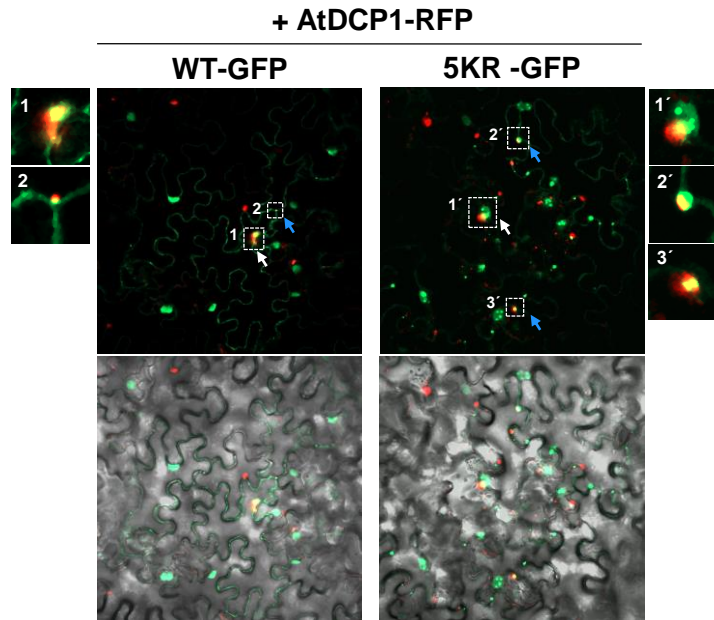

**Supplementary Figure S5. Co-localization of OsFKBP20-1b with p-body.**

GFP fused WT\_ and 5KR\_OsFKBP20-1b constructs and p-body marker protein, AtDCP1-RFP were transiently co-expressed in leaves of 4-week-old *Nicotiana benthamiana* using agro-infiltration. Two days after infiltration, plants epidermal cells were observed GFP and RFP fluorescence using confocal microscopy. The white square box 1 shows the enlarged nuclear area, and 2-3 shows the enlarged cytoplasmic focal area.

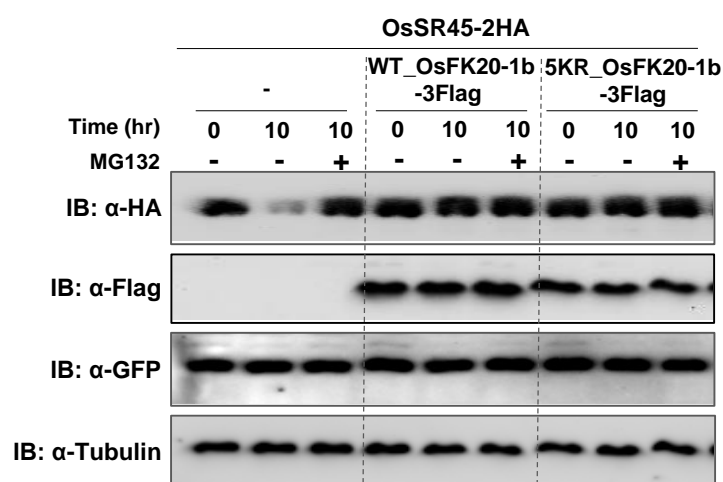

**Supplementary Figure S6. OsSR45 protein stability under OsFKBP20-1b WT or 5KR co-expressed conditions.**

Protoplasts were isolated from the shoots of 10-day-old *osfkbp20-1b* *k/o* seedlings and HA-tagged-OsSR45, flag-tagged-OsFKBP20-1b WT or 5KR and GFP were transiently expressed by PEG mediated transfection. Total proteins were isolated at 22 h (0 h) after protoplast transfection and incubated with or without MG132 for 10 h. The immunoblot assay was performed using HA, Flag, GFP and tubulin antibodies. Tubulin was used as a control to evaluate potential variation in the total amounts of protein loaded. GFP was used as a control for variation of transfection efficiency.

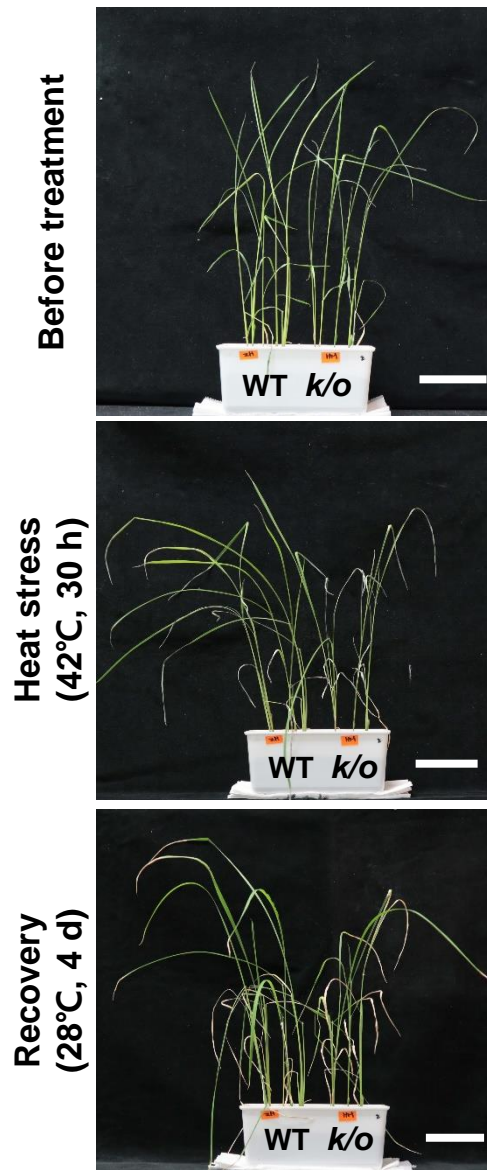

**Supplementary Figure S7. Hypersensitive phenotype of *osfkbp20-1b* knock out plants under heat stress condition.**

Wild type (WT, ZH11) and *osfkbp20-1b* k/o rice plants were grown on growth chamber (28°C, 16h light/ 8h dark, 50% humidity condition) until four leaf stage. Heat stress was treated at 42°C for 30 hours and recovery performed at 28°C for 4 days. Bar = 6 cm

**Table S1.** Gene-specific primers used in this study

| Gene name          | Primer Sequences                       |                                                                                                     | Applications         |
|--------------------|----------------------------------------|-----------------------------------------------------------------------------------------------------|----------------------|
|                    | F, forward [5'-3']                     | R, reverse [5'-3']                                                                                  |                      |
| <i>OsFkbp20-1b</i> | GAATTCATGTCTGAGACCATAGATTTAACC<br>GGAG | GGATCCCTATTTGGCCTTCTTTCCCTTGCC<br>CTT                                                               | RT-PCR               |
| <i>OsFKBP20-1b</i> | GACAGATCTCATGTCTGAGACCATAGATT<br>AAC   | GACACTAGTTTTGGCCTTCTTTCCCTTGCC<br>C                                                                 | Localization         |
| <i>OsFKBP20-1b</i> | TACCATGGGATGTCTGAGACCATAGA             | AACCTCGAGTCAAGCGTAATCTGGAACA<br>TCGTATGGGTAAGCGTAATCTGGAACAT<br>CGTATGGGTATTGGCCTTCTTTCCCTTGCC<br>C | In vitro SUMOylation |
| <i>OsFKBP20-1b</i> | TCTAGAATGTCTGAGACCATAGATTTAAC          | CTCGAGTTTGGCCTTCTTTCCCTTGCCCT                                                                       | BiFC                 |
| <i>OsSCE1</i>      | ACTAGTATGTCGGGAGGGATCGCACGCGG          | CTCGAGGGCGTGTTCTGTTCAGGCCAA<br>G                                                                    | BiFC                 |
| <i>OsSCE2</i>      | ACTAGTATGTCGGGGGGAATCGCGCGCGG          | CTCGAGGACAATCGGAGGATACTGCTTG<br>G                                                                   | BiFC                 |
| <i>OsSCE3</i>      | ACTAGTATGGCATCCGGAGGAGGCATCGC          | CTCGAGCAGAGCTGAAGGATACTTCTTA<br>G                                                                   | BiFC                 |
| <i>OsSUMO1</i>     | TCTAGAATGTCGTCGCCCGGGGGAGGA            | ACTAGTGGCAGGCAGAGAGCCCCAGTC<br>T                                                                    | BiFC                 |
| <i>OsSUMO2</i>     | TCTAGAATGTCGGCCGCCGGGGAGGAGG<br>A      | ACTAGTGGCAGGCAGGCAGCCTCCAGTC<br>T                                                                   | BiFC                 |
| <i>OsSUMO3</i>     | ACTAGTAGCGGCCACCGATCAGCTCCT            | AGATCTGATGTTCGGCCGGTCTGGCATCA                                                                       | BiFC                 |
| <i>OsSR45</i>      | AGAACTAGTATGGCGAAGCCGCGCCGCGG<br>C     | AGAACTAGTCCTGCGCCTCGGGGAAGGT<br>G                                                                   | BiFC                 |
| <i>OsU1-70k</i>    | AGA ACTAGT ATGGGCGACTACGGCAGCG<br>GGAT | AGA ACTAGT GTTATTGTGCTCATCAGCA<br>GCTTG                                                             | BiFC                 |
| <i>AtDCP1</i>      | ACTAGATCTAATGTCTCAAACGGGAAGA<br>T      | CGTAGATCTACTTGTTGAAGTGCATTTTG<br>TAA                                                                | Localization         |
| <i>AtUBP1b</i>     | ACTAGATCTAATGCAGAGGTTGAAGC             | ACGAGATCTCCCTGGTAGTACATGAGCT<br>GC                                                                  | Localization         |
| <i>OsLea3</i>      | TTGATCACTTGATTGTTCTTGGT                | TGCCGGCCTCGTCTTCGGTCAT                                                                              | qPCR                 |
| <i>OsNac5</i>      | AAGGCCTCAGATCGGAGATTGAATG              | GTAGATTCCGCACAACACCCAAT                                                                             | qPCR                 |
| <i>OsHsp90</i>     | ATGGCCTCGGAGACGGAGACGTT                | CTCCATAAACTCCTTAGTCCCTG                                                                             | qPCR                 |
| <i>OsHsp101</i>    | CAAGGTGATCCTCTTCATCGACGAG              | GCTCCACCTCCAGCTGAATCCTCTTC                                                                          | qPCR                 |
| <i>OsLea3 AS</i>   | ACCAGGACCAGGCTAGCTACC                  | TGCCGGCCTCGTCTTCGGTCAT                                                                              | RT-PCR               |
| <i>OsHsfA2d</i>    | TCCTCCCACGCTTCTTCAAGCACAAAC            | CAAGTGCCTGCTGAGATCCAGGGAGAT                                                                         | RT-PCR               |
| <i>OsHsfA2a</i>    | GTCCTGGTTTCGACGAGCTCCAT                | TCGTCCACGACCTCGTACGTCTTGC                                                                           | RT-PCR               |
| <i>OsAct1</i>      | CATGCTATCCCTCGTCTCGACCT                | CGCACTTCATGATGGAGTTGTAT                                                                             | RT-PCR, qPCR         |
